# Supplementary material
Source: MDPI journal article supplement (https://www.mdpi.com/2076-3417/14/6/2231)
Supplement: s1 [file s1]

Date \_\_\_\_\_

**Simulator Sickness Questionnaire**

Participant \_\_\_\_\_  
**SSQ-X**

Are you motion sick now? Circle YES or NO

Circle how much each symptom below is affecting you now.

0 = “not at all”

1 = “mild”

2 = “moderate”

3 = “severe”

- |                             |   |   |   |   |
|-----------------------------|---|---|---|---|
| 1. General discomfort       | 0 | 1 | 2 | 3 |
| 2. Fatigue                  | 0 | 1 | 2 | 3 |
| 3. Headache                 | 0 | 1 | 2 | 3 |
| 4. Eyestrain                | 0 | 1 | 2 | 3 |
| 5. Difficulty focusing      | 0 | 1 | 2 | 3 |
| 6. Increased salivation     | 0 | 1 | 2 | 3 |
| 7. Sweating                 | 0 | 1 | 2 | 3 |
| 8. Nausea                   | 0 | 1 | 2 | 3 |
| 9. Difficulty concentrating | 0 | 1 | 2 | 3 |
| 10. Fullness of head        | 0 | 1 | 2 | 3 |
| 11. Blurred vision          | 0 | 1 | 2 | 3 |
| 12. Dizziness (eyes open)   | 0 | 1 | 2 | 3 |
| 13. Dizziness (eyes closed) | 0 | 1 | 2 | 3 |
| 14. Vertigo*                | 0 | 1 | 2 | 3 |
| 15. Stomach awareness**     | 0 | 1 | 2 | 3 |
| 16. Burping                 | 0 | 1 | 2 | 3 |

\*Vertigo is experienced as loss of orientation with respect to vertical upright

\*\*Stomach awareness is usually used to indicate a feeling of discomfort that is just short of nausea.
